# Supplementary material for: Nanoclusters with specific DNA overhangs: modifying configurability, engineering contrary logic pairs and the parity generator/checker for error detection
Source: Royal Society of Chemistry journal article supplement (doi:10.1039/d3nr04167k), 2023-01-01
Supplement: d3nr04167k1.pdf [file d3nr04167k1.pdf]

Electronic Supplementary Information for

**Nanoclusters with Specific DNA-Overhangs: Modifying Configurability, Engineering Contrary Logic Pairs and Parity Generator/Checker for Error Detection**

Mohamed Nabeel Mattath,<sup>a,b</sup> Haibin Zhang,<sup>c</sup> Debasis Ghosh,<sup>b</sup> Thimmaiah Govindaraju,<sup>b\*</sup> and Shuo Shi<sup>a\*</sup>

<sup>a</sup>School of Chemical Science and Engineering, Department of Clinical Laboratory, Shanghai Tenth People's Hospital, Tongji University, 1239 Siping Rd, Shanghai, 200092, PR China. Email: [shishuo@tongji.edu.cn](mailto:shishuo@tongji.edu.cn)

<sup>b</sup>Bioorganic Chemistry Laboratory, New Chemistry Unit and School of Advanced Materials (SAMat), Jawaharlal Nehru Centre for Advanced Scientific Research, Jakkur P.O., Bengaluru 560064, Karnataka, India. Email: [tgraju@jncasr.ac.in](mailto:tgraju@jncasr.ac.in)

<sup>c</sup>Endoscopy Center, Department of Gastroenterology, Shanghai East Hospital, Tongji University, School of Medicine, Shanghai, 200092.

| Sl. No.           | Content                                                                                                                                                                                  | Page No. |
|-------------------|------------------------------------------------------------------------------------------------------------------------------------------------------------------------------------------|----------|
| <b>Figures</b>    |                                                                                                                                                                                          |          |
| Fig. S1           | (A) SEM image and (B) SEM-EDS elemental mapping images of T-Au/Ag NCs.                                                                                                                   | S3       |
| Fig. S2           | (A) Temperature-dependent solid-state emission intensity of T-Au/Ag NCs. (B) Temperature dependence of the excited-state lifetimes. (C) Difference in emission intensity of T-Au/Ag NCs. | S3       |
| Fig. S3           | (A) Time dependent emission spectra of T-Au/Ag NCs and M-Au/Ag NCs. (B) Time dependent normalized PL spectra of T-Au/Ag NCs under UV light (365 nm).                                     | S4       |
| Fig. S4           | (A) Normalized PL spectra of T-Au/Ag NCs under different pH windows. (B) Normalized PL spectra of T-Au/Ag NCs as control in the presence of different metal ions of 30 $\mu$ M.          | S4       |
| Fig. S5           | (A) Absorption and emission of TO. (B) Different excitation measurement from 450 to 510 nm of blank TO.                                                                                  | S4       |
| Fig. S6           | (A) PL spectra and (B) normalized PL intensities of TO incorporated C-DNA NCs upon increasing the concentration.                                                                         | S5       |
| Fig. S7           | Column representation of TO incorporated C-DNA NCs and T-Au/Ag NCs in the presence of Hg <sup>II</sup> .                                                                                 | S5       |
| Fig. S8           | The study of fluorescence spectra in the order of addition in the preincubation of the M-Au/Ag NCs                                                                                       | S5       |
| Fig. S9           | The study of fluorescence spectra in the order of addition in the preincubation of the DNA-Au/Ag NCs                                                                                     | S6       |
| <b>Tables</b>     |                                                                                                                                                                                          |          |
| Table S1.         | Truth tables of different types of CLPs, such as (A) YES <sup>^</sup> NOT, (B) OR <sup>^</sup> NOR and (C) INH <sup>^</sup> IMP.                                                         | S6       |
| Table S2.         | Summary of phosphorescence decay profiles of T-Au/Ag NCs in Solid-state.                                                                                                                 | S6       |
| Table S3.         | Summary of phosphorescence decay of T-Au/Ag NCs and various Hg <sup>II</sup> concentration in solution (citrate buffer).                                                                 | S7       |
| Table S4.         | Truth table of the 2-bit even/odd pG                                                                                                                                                     | S7       |
| Table S5.         | A molecular perspective representation of chemical structures illustrating interactions leading to different outputs                                                                     | S7       |
| Table S6.         | Comparison of the proposed method in error detection using DNA computing with the previously reported methods                                                                            | S8       |
| <b>References</b> |                                                                                                                                                                                          | S8       |

Figures and tables:

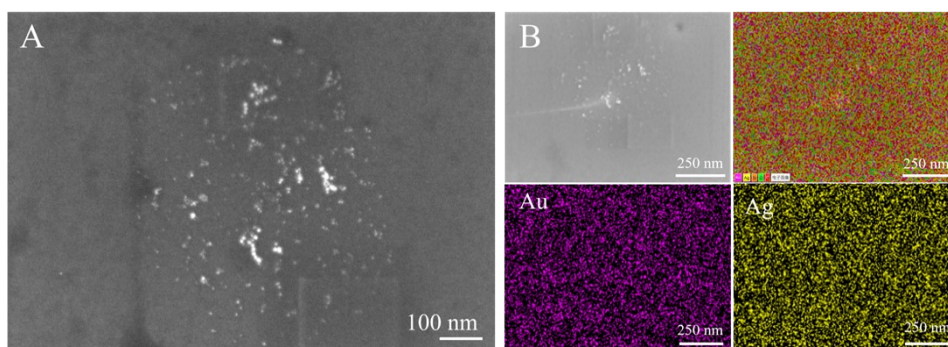

**Fig. S1** (A) SEM image (scale: 100 nm) and (B) SEM-EDS elemental mapping images of Au and Ag in T-Au/Ag NCs (scale: 250 nm).

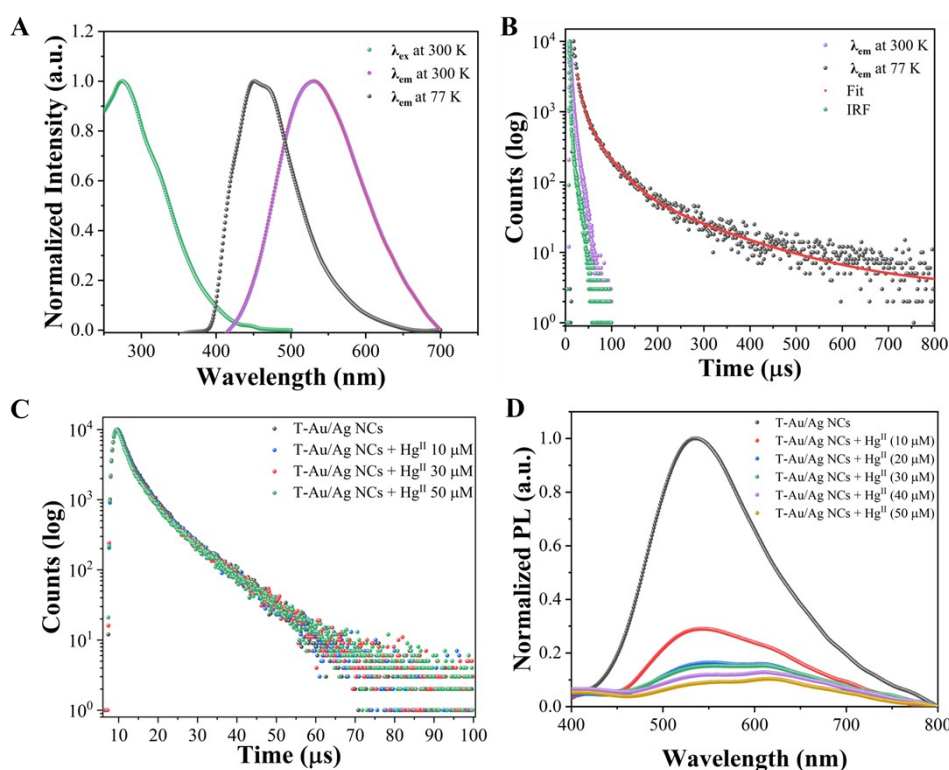

**Fig. S2** (A) Temperature-dependent solid-state emission intensity of T-Au/Ag NCs at 300 K and 77 K upon excitation at 275 nm. (B) Temperature dependence of the excited-state lifetimes of T-Au/Ag NCs at 300 K and 77 K, IRF: instrument response function. (C) Lifetime decay plot of T-Au/Ag NCs and sequential addition of  $\text{Hg}^{\text{II}}$  in increasing concentration. (D) Difference in emission intensity of T-Au/Ag NCs upon addition  $\text{Hg}^{\text{II}}$  with increasing concentration (10 - 50  $\mu\text{M}$ ).

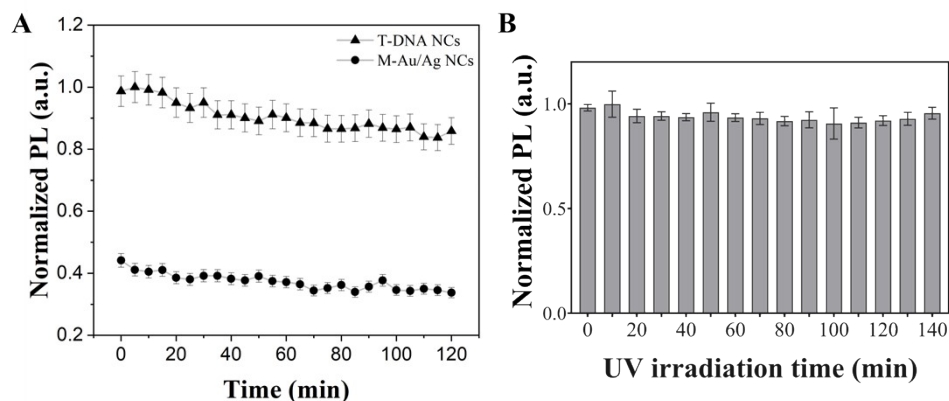

**Fig. S3** (A) Time dependent emission spectra of T-Au/Ag NCs and M-Au/Ag NCs. (B) Time dependent normalized PL spectra of T-Au/Ag NCs under UV light (365 nm).

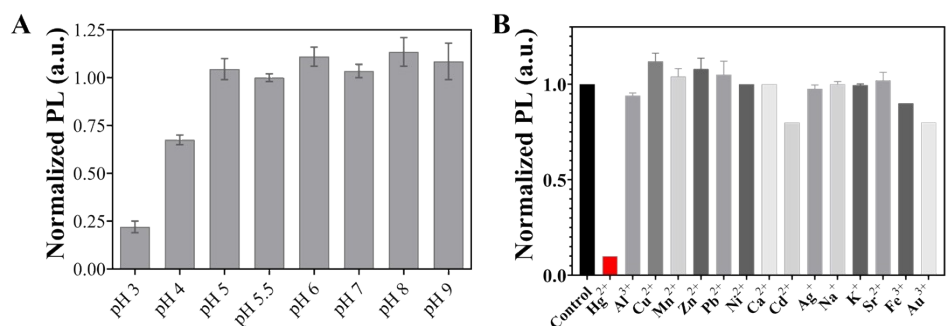

**Fig. S4** (A) Normalized PL spectra of T-Au/Ag NCs under different pH windows. (B) Normalized PL spectra of T-Au/Ag NCs as control in the presence of different metal ions of 30  $\mu$ M.

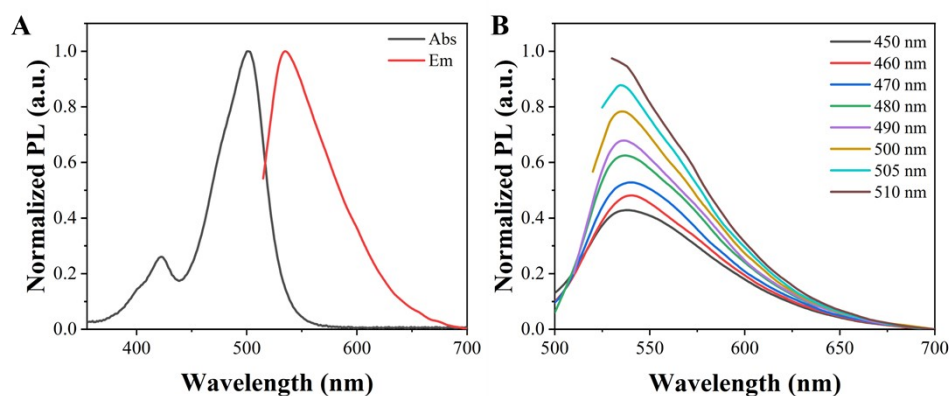

**Fig. S5** (A) Absorption and emission of TO. (B) Different excitation measurement from 450 to 510 nm of blank TO.

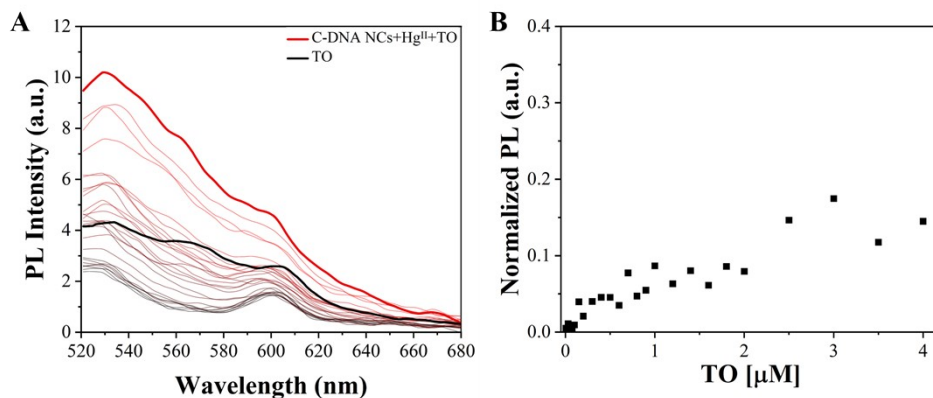

**Fig. S6** (A) PL spectra and (B) normalized PL intensities of TO incorporated C-DNA NCs upon increasing the concentration.

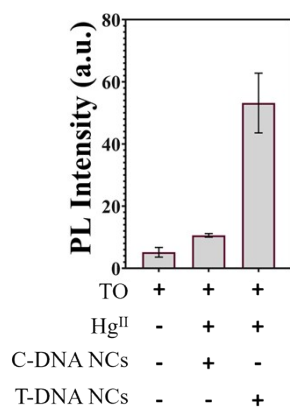

**Fig. S7** Column representation PL intensity of TO incorporated C-DNA NCs and T-Au/Ag NCs in the presence of Hg<sup>II</sup>.

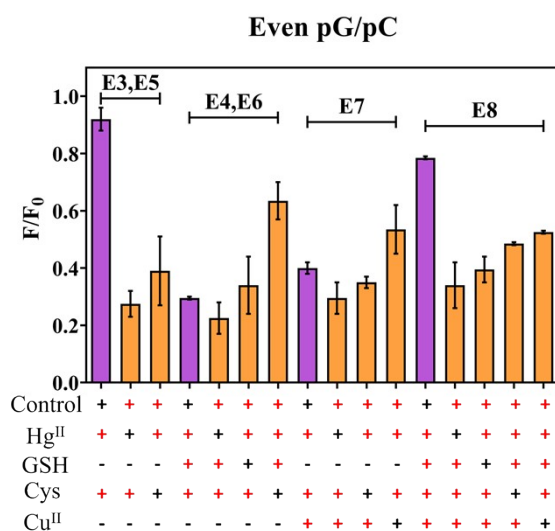

**Fig. S8** The study of PL spectra in the order of addition in the preincubation of the M-Au/Ag NCs (when P = 1) with different analytes in different entries (E3, E4, E5, E6, E7, E8) for even pG/pC. The “+” (plus icon in red color) in Y-axis represents those which analytes are undergo for 10 min preincubation.

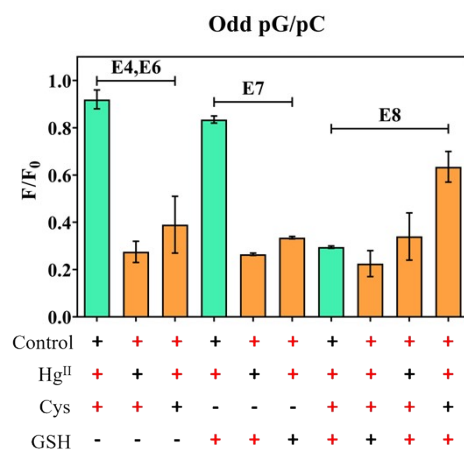

**Fig. S9** The study of PL spectra in the order of addition in the preincubation of the DNA-Au/Ag NCs (when P = 1) with different analytes in different entries (E4, E6, E7, E8) for odd pG/pC. The “+” (plus icon in red color) in Y-axis represents those which analytes are undergo for 10 min preincubation.

**Table S1.** Truth tables of different types of CLPs, such as (A) YES^NOT, (B) OR^NOR and (C) INH^IMP.

| A      |             |                   | B   |        |             |                  |  |
|--------|-------------|-------------------|-----|--------|-------------|------------------|--|
| Inputs |             | Outputs (YES^NOT) |     | Inputs |             | Outputs (OR^NOR) |  |
| IN1    | M-Au/Ag NCs | T-Au/Ag NCs       | IN1 | IN2    | M-Au/Ag NCs | T-Au/Ag NCs      |  |
| 0      | 0           | 1                 | 0   | 0      | 0           | 1                |  |
| 1      | 1           | 0                 | 0   | 1      | 1           | 0                |  |
|        |             |                   | 1   | 0      | 1           | 0                |  |
|        |             |                   | 1   | 1      | 1           | 0                |  |

  

| C      |     |                   |             |
|--------|-----|-------------------|-------------|
| Inputs |     | Outputs (INH^IMP) |             |
| IN3    | IN4 | M-Au/Ag NCs       | T-Au/Ag NCs |
| 0      | 0   | 0                 | 1           |
| 0      | 1   | 0                 | 0           |
| 1      | 0   | 1                 | 1           |
| 1      | 1   | 0                 | 1           |

**Table S2.** Summary of phosphorescence decay profiles of T-Au/Ag NCs in Solid-state.

|                    | $\lambda_{exc.}$<br>(nm) | $\lambda_{monitored}$<br>(nm) | $t_1$<br>( $\mu s$ ) | $t_2$<br>( $\mu s$ ) | $t_3$<br>( $\mu s$ ) | $\langle t_{avg.} \rangle$<br>( $\mu s$ ) |
|--------------------|--------------------------|-------------------------------|----------------------|----------------------|----------------------|-------------------------------------------|
| T-DNA NCs at 300 K | 275                      | 530                           | 2.6 (40 %)           | 9.0 (59 %)           | -                    | <b>6.3</b>                                |
| T-DNA NCs at 77 K  | 275                      | 450                           | 9.01 (29 %)          | 38.1 (47 %)          | 165.8 (23 %)         | <b>58.6</b>                               |

**Table S3.** Summary of phosphorescence decay of T-Au/Ag NCs and various Hg<sup>II</sup> concentration in solution (citrate buffer).

|                                     | $\lambda_{exc.}$<br>(nm) | $\lambda_{collected}$<br>(nm) | $t_1$<br>(ms) | $t_2$<br>(ms) | $\langle t_{avg.} \rangle$<br>(ms) |
|-------------------------------------|--------------------------|-------------------------------|---------------|---------------|------------------------------------|
| T-DNA NCs                           | 320                      | 535                           | 2.5 (51 %)    | 9.0 (48 %)    | 5.6                                |
| T-DNA NCs +Hg <sup>II</sup> (10 mM) | 320                      | 535                           | 2.4 (44 %)    | 8.9 (55 %)    | 5.9                                |
| T-DNA NCs +Hg <sup>II</sup> (20 mM) | 320                      | 535                           | 2.6 (43 %)    | 9.4 (56 %)    | 6.2                                |
| T-DNA NCs +Hg <sup>II</sup> (30 mM) | 320                      | 535                           | 2.8 (42 %)    | 9.8 (57 %)    | 6.7                                |
| T-DNA NCs +Hg <sup>II</sup> (40 mM) | 320                      | 535                           | 2.9 (42 %)    | 9.9 (57 %)    | 6.8                                |
| T-DNA NCs +Hg <sup>II</sup> (50 mM) | 320                      | 535                           | 2.8 (39 %)    | 9.7 (60 %)    | 6.9                                |

**Table S4.** Truth table of the 2-bit even/odd pG (D1' = Cys, D2' = GSH, <sup>a</sup> number of 1's in the D1'D2'P' string for even pG; D1'' = Hg<sup>II</sup>, D2'' = Cys, <sup>a</sup> number of 1's in the D1''D2''P'' string for odd pG)

| Entry | Inputs |    | M-Au/Ag NCs (Even pG) |            | DNA-Au/Ag NCs (Odd pG) |            |
|-------|--------|----|-----------------------|------------|------------------------|------------|
|       | D1     | D2 | Outputs(P')           | $\Sigma^a$ | Outputs(P'')           | $\Sigma^a$ |
| 1     | 0      | 0  | 0                     | 0; even    | 1                      | 1; odd     |
| 2     | 0      | 1  | 1                     | 2; even    | 0                      | 1; odd     |
| 3     | 1      | 0  | 1                     | 2; even    | 0                      | 1; odd     |
| 4     | 1      | 1  | 0                     | 2; even    | 1                      | 3; odd     |

**Table S5.** A molecular perspective representation of chemical structures illustrating all possible interactions leading to different outputs.

| Molecular interaction                                                                                                       | Operation                                                                                       | Molecular interaction                                                                                                       | Operation                                                                              |
|-----------------------------------------------------------------------------------------------------------------------------|-------------------------------------------------------------------------------------------------|-----------------------------------------------------------------------------------------------------------------------------|----------------------------------------------------------------------------------------|
|  <p>Cytosine-Ag<sup>+</sup>-Cytosine</p> | Nanoclusters formation                                                                          |  <p>Thymine-Hg<sup>II</sup>-Thymine</p> | Nanoclusters ensemble formation, even pG (entry 1), odd pG (entry 3), odd pC (entry 5) |
|  <p>L-Cysteine-Ag or Au</p>              | YES-NOT, OR-NOR, odd pG (entry 2)                                                               |  <p>L-Glutathione-Ag or Au</p>          | Even pG (entry 2)                                                                      |
|  <p>L-Cysteine-Hg</p>                    | YES-NOT, OR-NOR, even pG (entry 3, 4), even pC (entry 5, 6, 8), odd pG (entry 4), odd pC (6, 8) |  <p>L-Cysteine-Cu</p>                   | Even pC (entry 7, 8)                                                                   |
|  <p>L-Glutathione-Hg</p>                 | OR-NOR, even pG (entry 4), even pC (entry 6, 8), odd pC (entry 7, 8)                            |  <p>L-Glutathione-Cu</p>                | Even pC (entry 8)                                                                      |

**Table S6.** Comparison of the proposed method in error detection using DNA computing with the previously reported methods.

| Platform                                         | No. of DNA utilized in the study |             |          | Assay                      | Even/Odd        | Ref                 |
|--------------------------------------------------|----------------------------------|-------------|----------|----------------------------|-----------------|---------------------|
|                                                  | Platform                         | Input entry | Total    |                            |                 |                     |
| TP/NMM/TMB                                       | 1                                | 3           | 4        | Fluorescence, Colorimetric | Even            | 1                   |
| Polydopamine nanosphere                          | 1                                | 3           | 4        | Fluorescence               | Even            | 2                   |
| SH-DNA, MCH                                      | 1                                | 3           | 4        | Electrochemical            | Even            | 3                   |
| H-AgNCs, IN2/Xaux                                | 3                                | 3           | 6        | Fluorescence               | Even/Odd        | 4                   |
| GCNNs, Ru(phen) <sub>3</sub> <sup>2+</sup> , GCE | 4                                | 3           | 7        | ECL-RET                    | Even/Odd        | 5                   |
| H1, H2, H3, Exo III, MB, IN1/AX1                 | 5                                | 3           | 8        | Electrochemical            | Even/Odd        | 6                   |
| <b>M-Au/Ag NCs, T-DNA NCs</b>                    | <b>1</b>                         | <b>0</b>    | <b>1</b> | <b>Photoluminescence</b>   | <b>Even/Odd</b> | <b>Present work</b> |

## References

1. D. Fan, E. Wang and S. Dong, *Chem. Sci.*, 2017, **8**, 1888-1895.
2. D. Fan, E. Wang and S. Dong, *ACS Appl. Mater. Interfaces*, 2017, **9**, 1322-1330.
3. D. Fan, Y. Fan, E. Wang and S. Dong, *Chem. Sci.*, 2018, **9**, 6981-6987.
4. M. Lv, W. Zhou, D. Fan, Y. Guo, X. Zhu, J. Ren and E. Wang, *Adv. Mater.*, 2020, **32**, 1908480.
5. L. Zhu, L. Yu, T. Meng, Y. Peng and X. Yang, *Small*, 2021, **17**, 2102881.
6. L. Zhu, L. Yu and X. Yang, *ACS Appl. Mater. Interfaces*, 2021, **13**, 42250-42257.
